# Supplementary material
Source: Springer Nature journal article supplement (https://www.springermedizin.de/resource/supplementary/12889_2012_4126_MOESM1_ESM.pdf/9491562)
Supplement: MOESM1 [file 9491562]

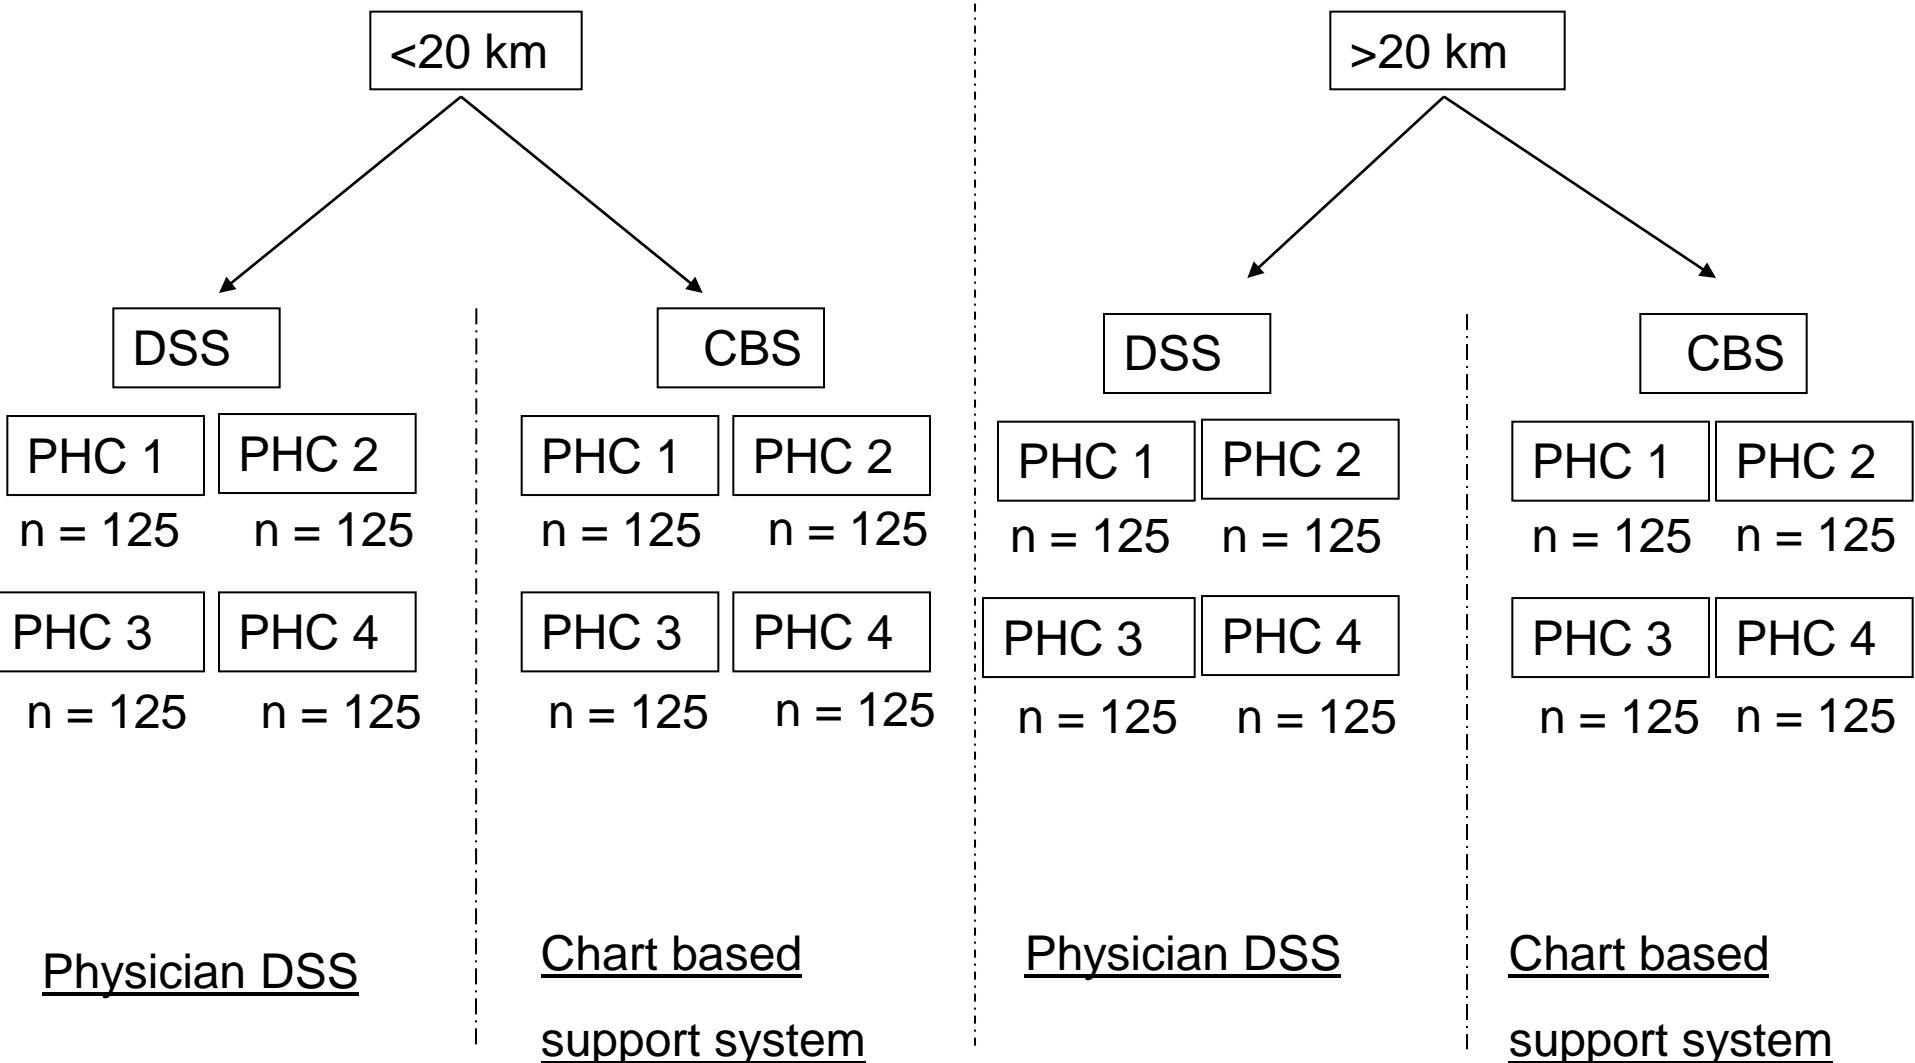

DSS – Decision support system; CBS – Chart Based Support System;

PHC – Primary Health Care centre;

< 20 km – distance from PHC to secondary health care system is less than 20 km;

> 20 km - distance from PHC to secondary health care system is more than 20 km.
